# Supplementary material for: IL17RB and IL17REL Expression Are Associated with Improved Prognosis in HPV-Infected Head and Neck Squamous Cell Carcinomas
Source: MDPI journal article supplement (doi:10.3390/pathogens12040572), 2023-04-07
Supplement: s1 [file s1]

# Supplementary Figure S1

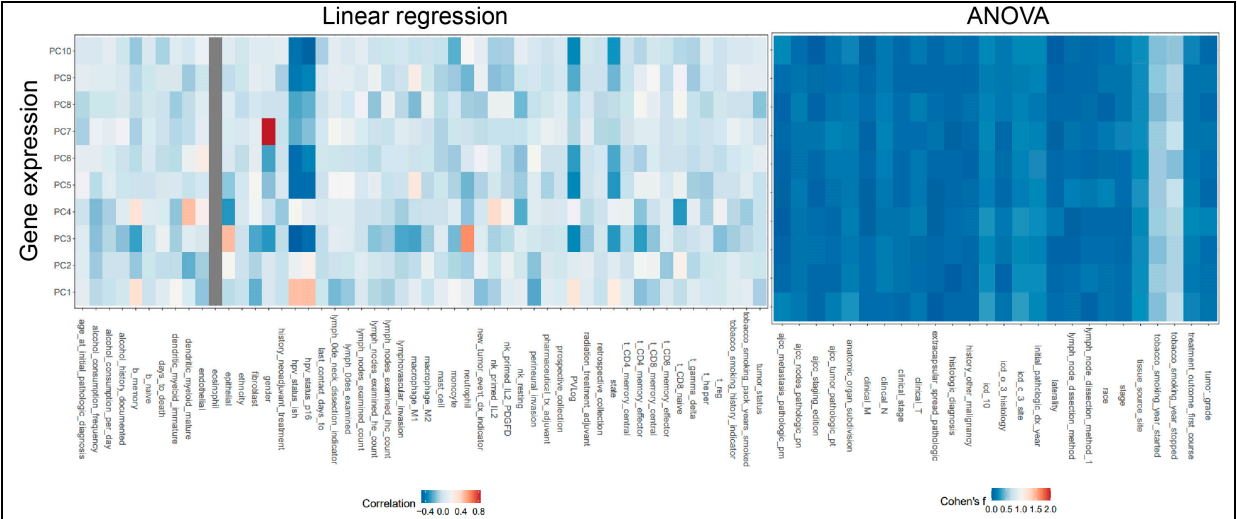

**Supplementary Figure 1.** The correlation between principal components (PCs) of gene expression and all covariates. As for numerical covariates (i.e. cell fraction, total living days), linear regression was performed while ANOVA was applied to categorical covariates (i.e. anatomic organ subdivision). Neutrophil, epithelial, dendritic cell infiltration, gender and HPV infection were found to associated with gene expression of TCGA-HNSC patients. However, in this study, we only focused on the single effector HPV infection.

# Supplementary Figure S2

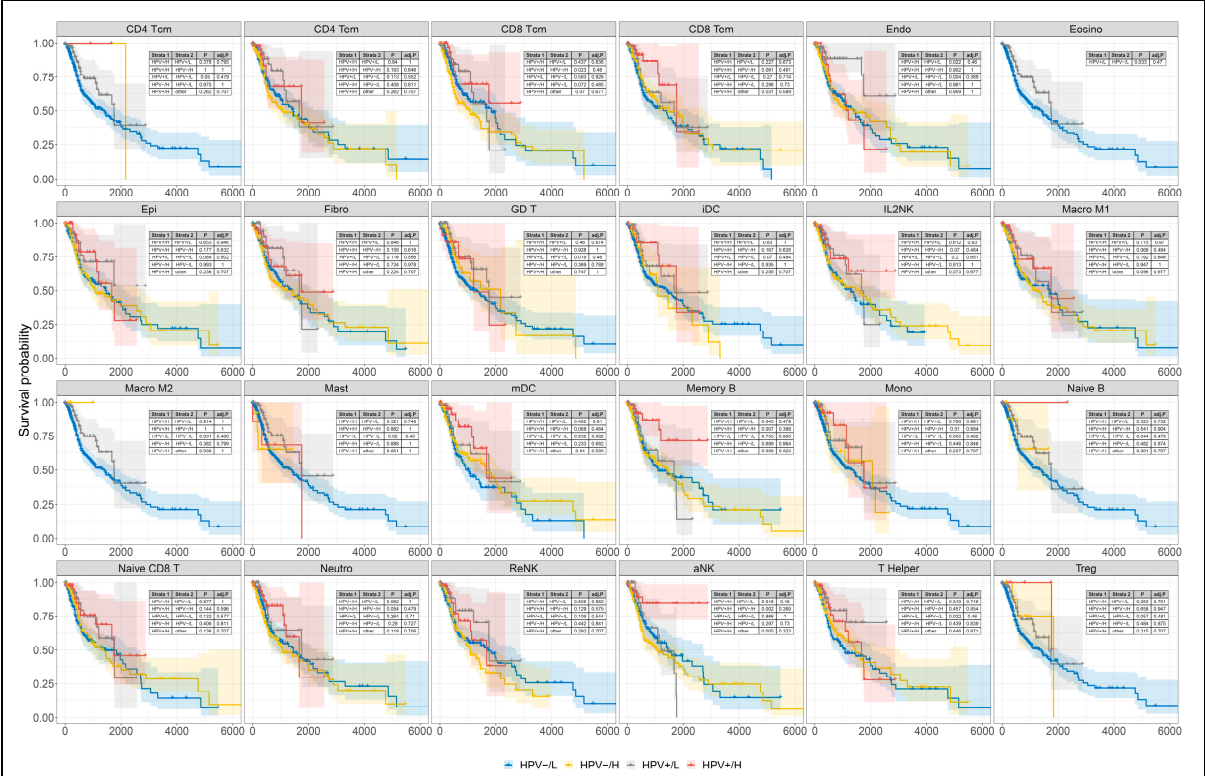

**Supplementary Figure 2.** The KM survival curves (y-axis, survival probability; x-axis, days) constructed for combinations of HPV infection and 24 different cell TS expression in HNSC patient tumors. Each cell TS expression was split by the median into L and H groups. HNSC patients with

both HPV infection and high expression of either memory B cell TS or aNK TS had significantly improved prognosis compared to other groups.

Supplementary Figure S3

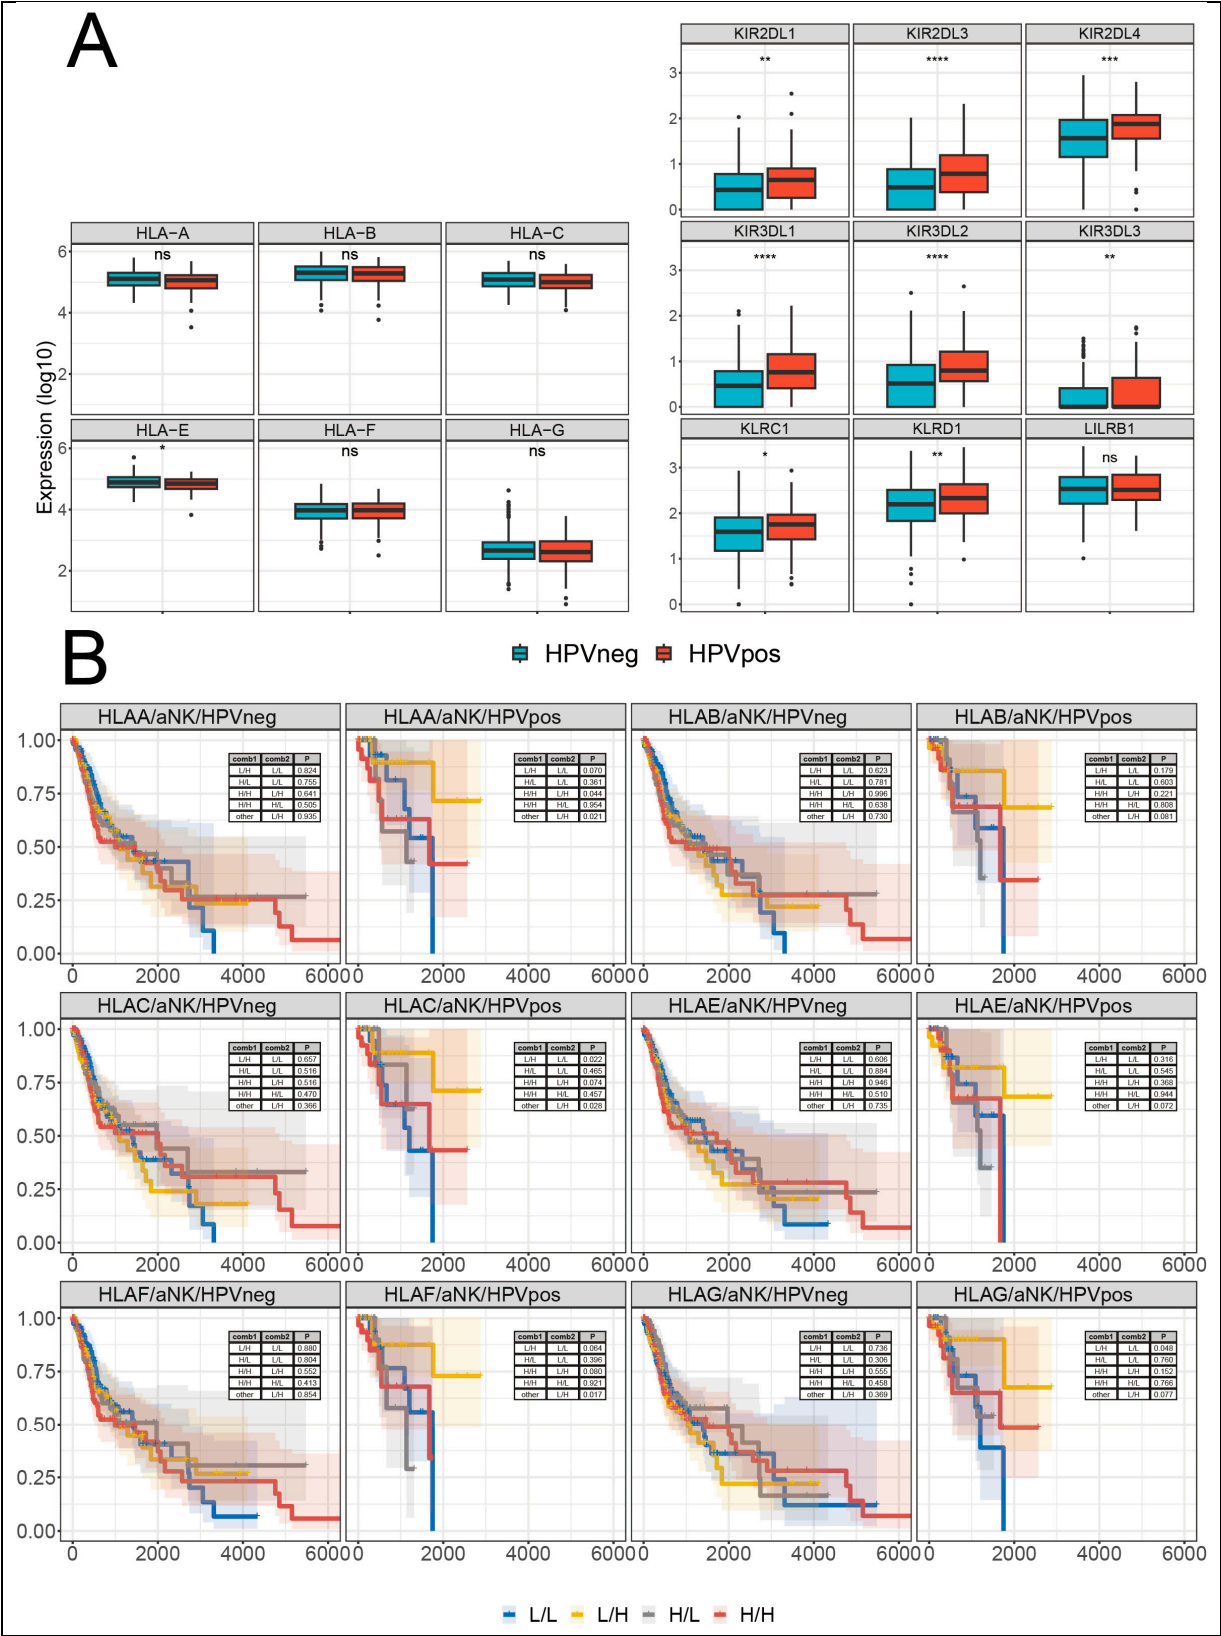

**Supplementary Figure 3.** Abundance and survival analysis of MHC-I molecules and cognate NK cell receptors. **(A)** Box plots comparing MHC-I variants and NK cell MHC-I cognate inhibitory receptor gene expression between HPV negative and positive HNSC patients. *HLA-E* were significantly downregulated while *KIR2DL1*, *KIR2DL3*, *KIR2DL4*, *KIR3DL1*, *KIR3DL2*, *KIR3DL3*, *KLRC1* and *KLRD1* were all significantly upregulated in HPV infected HNSC patients. **(B)** Combined HNSC patient survival analysis stratified for MHC-I variants and aNK TS expression in both HPV negative and positive patients. KM curves (y-axis, survival probability; x-axis, days) display HPV-infected or free HNSC patient survival plotted in all four combinations for each stratum (L/L, L/H, H/L, and H/H, both L and H groups were split by the median gene or cell TS expression). For patients with HPV infection, only low expression of MHC-I molecules and high expression of aNK TS resulted in enhanced prognosis.

## Supplementary Table S4

**Supplementary File 4.** All differentially expressed genes (logFC >= 1.5 or logFC <= -1.5 and FDR <= 0.05) in HPV infected HNSC patients.

## Supplementary Figure S5

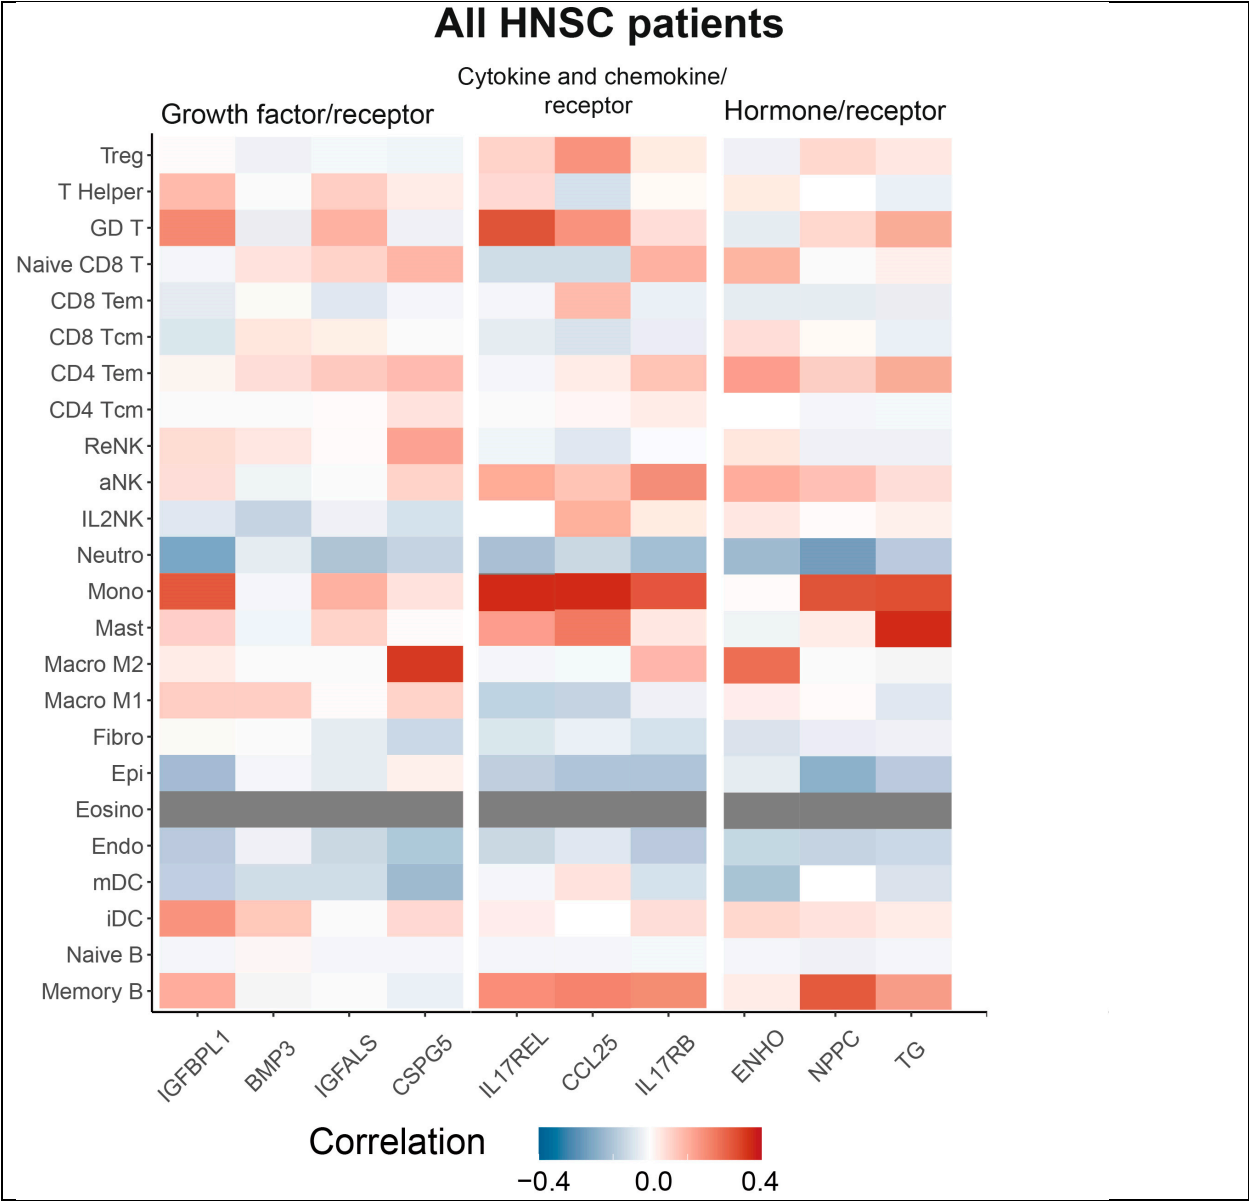

**Supplementary Figure 5.** The correlation heatmap of significantly upregulated secretome genes and all cell TS in all HNSC patients (both HPV infected and HPV uninfected patients).

**Supplementary Figure S6**

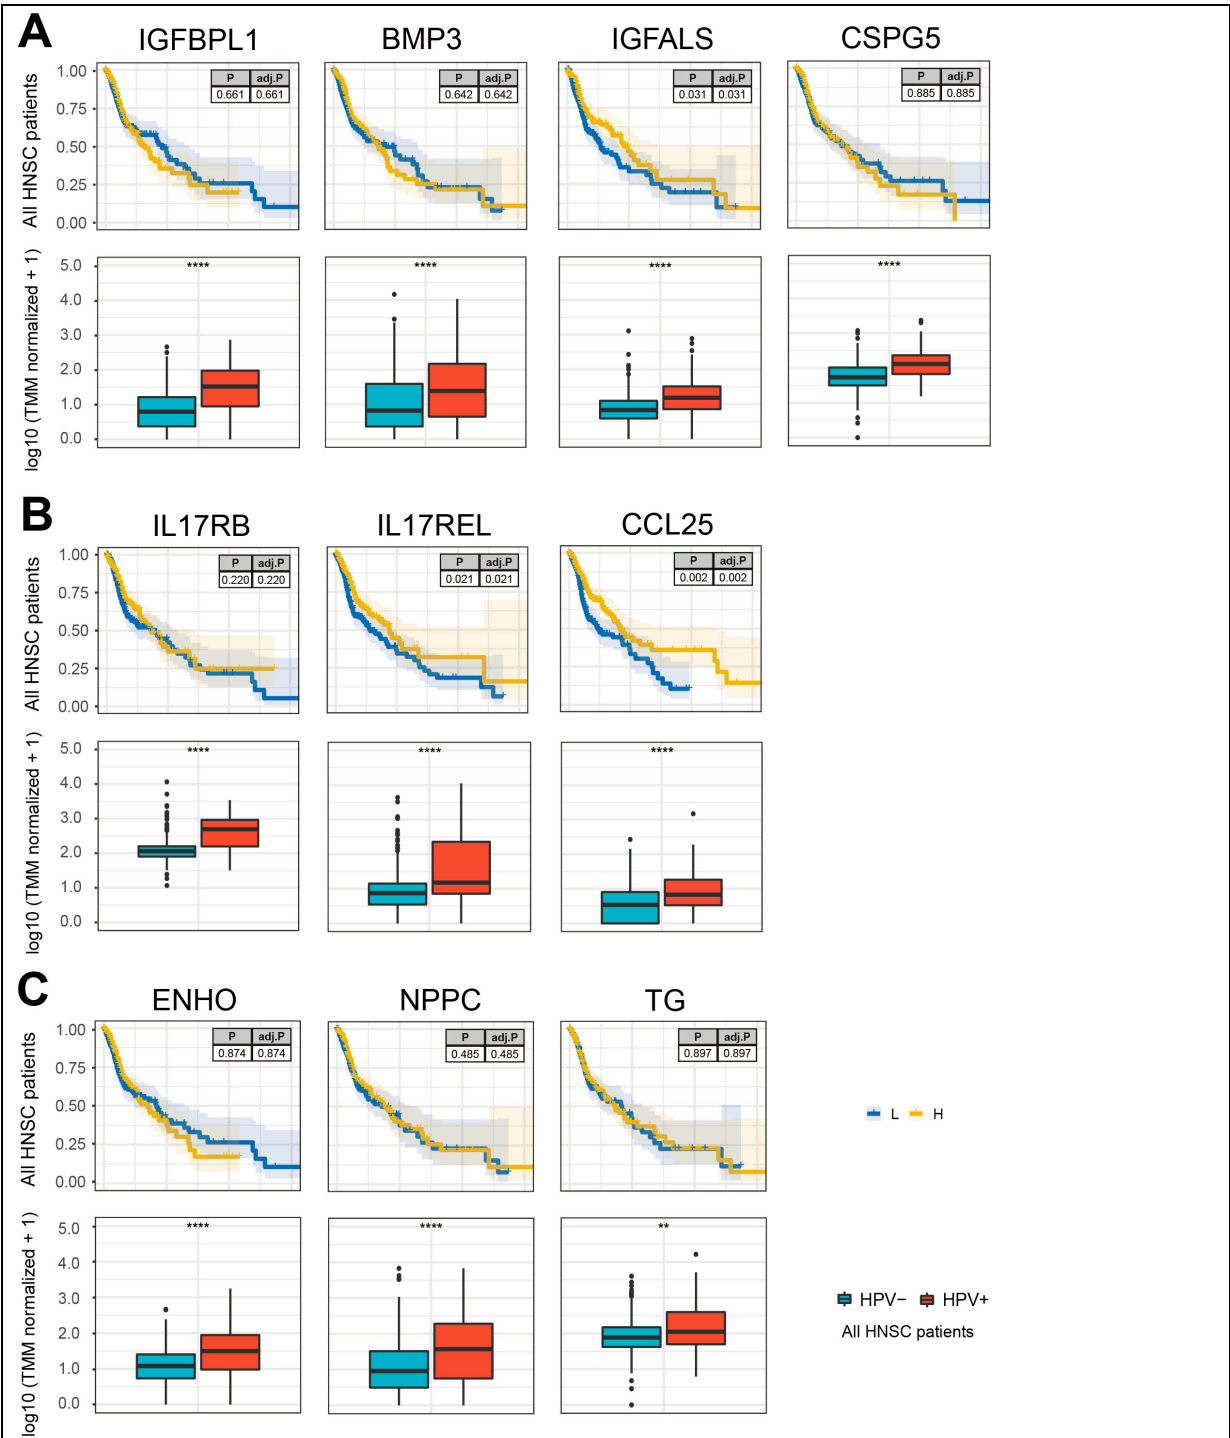

**Supplementary Figure 6.** Survival analysis and box plots of selected secretome genes in all HNSC patients. **(A)** KM curves (y-axis, survival probability; x-axis, days) and box plots constructed for growth factor, **(B)** cytokine and chemokine, **(C)** hormone and relevant receptor genes that were upregulated in all TCGA-HNSC patients. Each gene expression was split by the median into L and H groups. The box plots were grouped by HPV- and HPV+ HNSC patients with statistical tests. All eleven secret protein genes were upregulated in HPV infected HNSC patients.



# Supplementary Figure S7

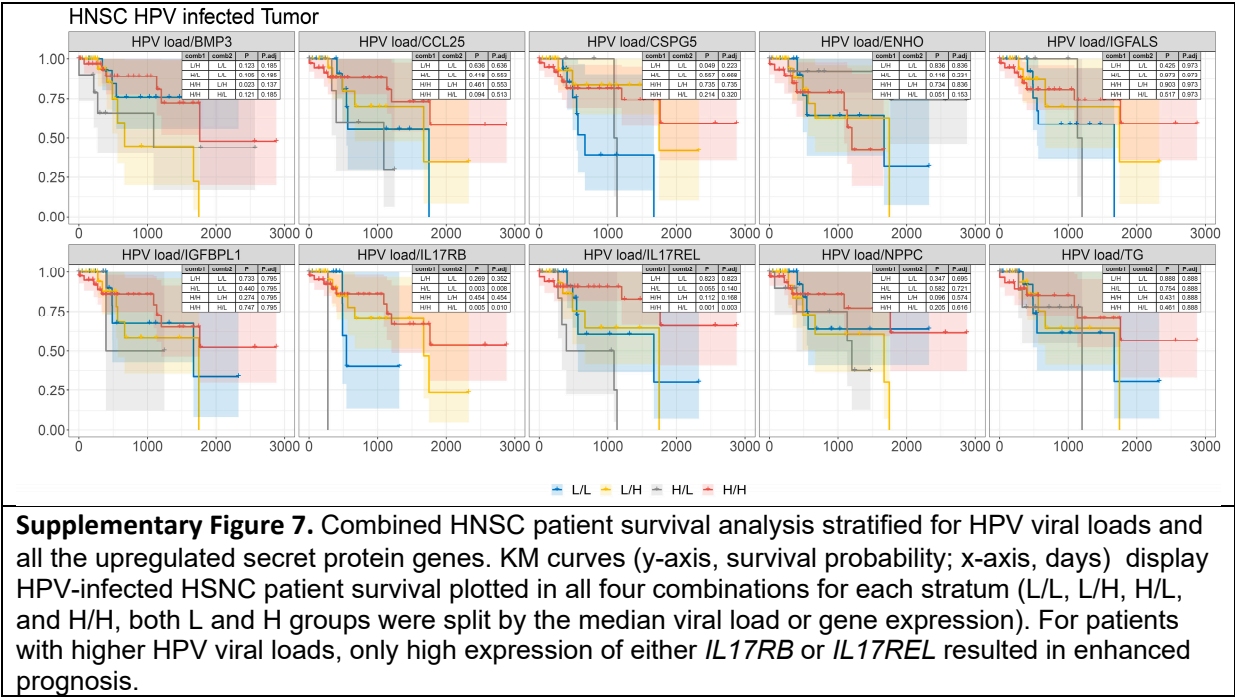

**Supplementary Figure 7.** Combined HNSC patient survival analysis stratified for HPV viral loads and all the upregulated secret protein genes. KM curves (y-axis, survival probability; x-axis, days) display HPV-infected HNSC patient survival plotted in all four combinations for each stratum (L/L, L/H, H/L, and H/H, both L and H groups were split by the median viral load or gene expression). For patients with higher HPV viral loads, only high expression of either *IL17RB* or *IL17REL* resulted in enhanced prognosis.

## Supplementary Figure S8

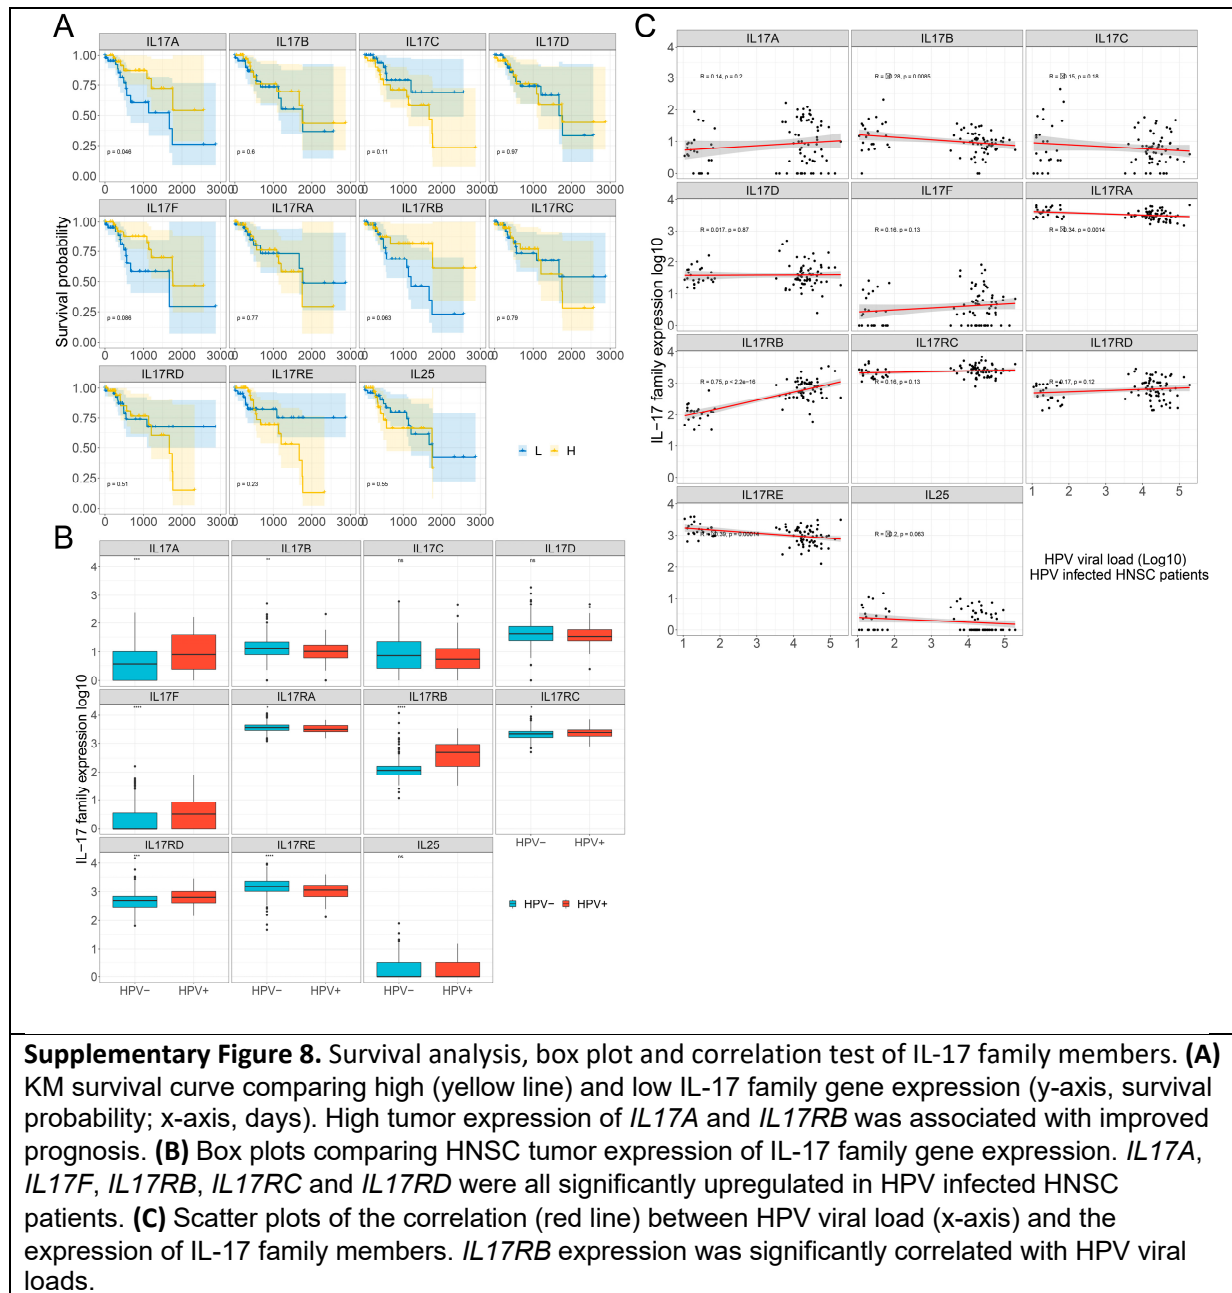

# Supplementary Figure S9

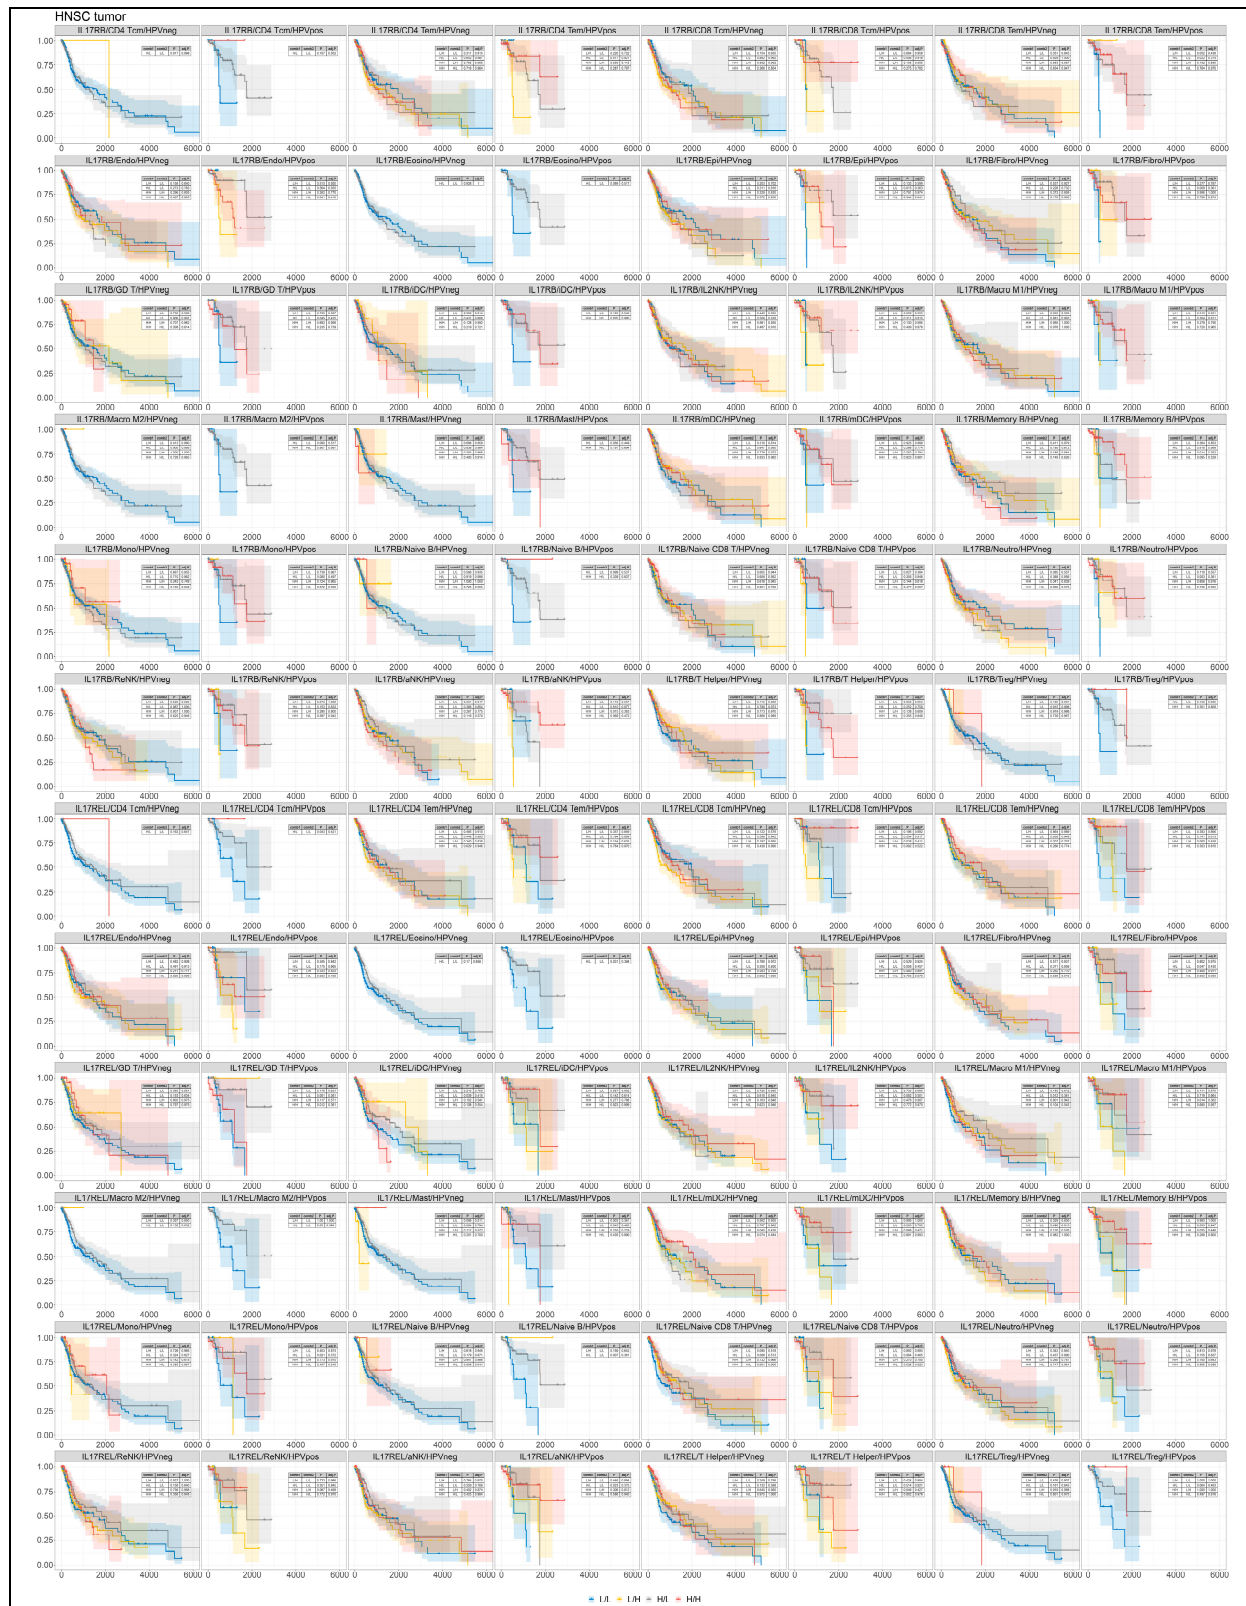

**Supplementary Figure 9.** Survival analysis of *IL17RB*, *IL17REL* and all cell TS. Combined HNSC patient survival analysis stratified for *IL17RB*, *IL17REL* and all cell TS expression in both HPV negative and positive patients. KM curves (y-axis, survival probability; x-axis, days) display HPV-infected or free HNSC patient survival plotted in all four combinations for each stratum (L/L, L/H, H/L, and H/H, both L and H groups were split by the median gene or cell TS expression).

## Supplementary Figure S10

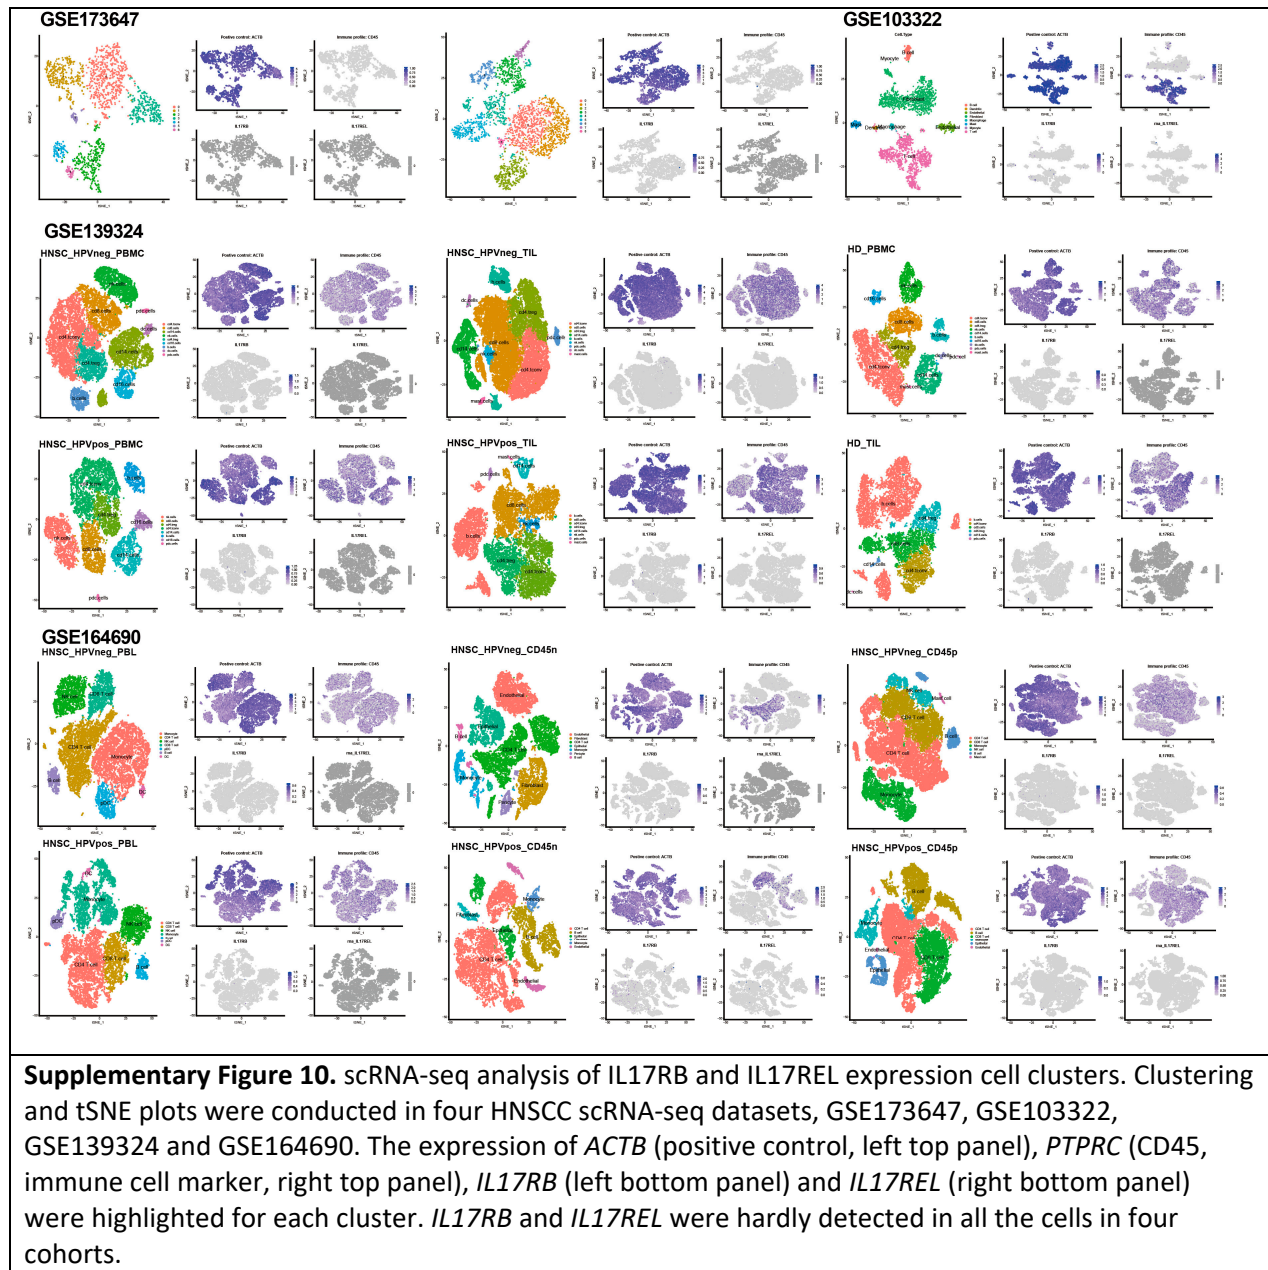

# Supplementary Figure S11

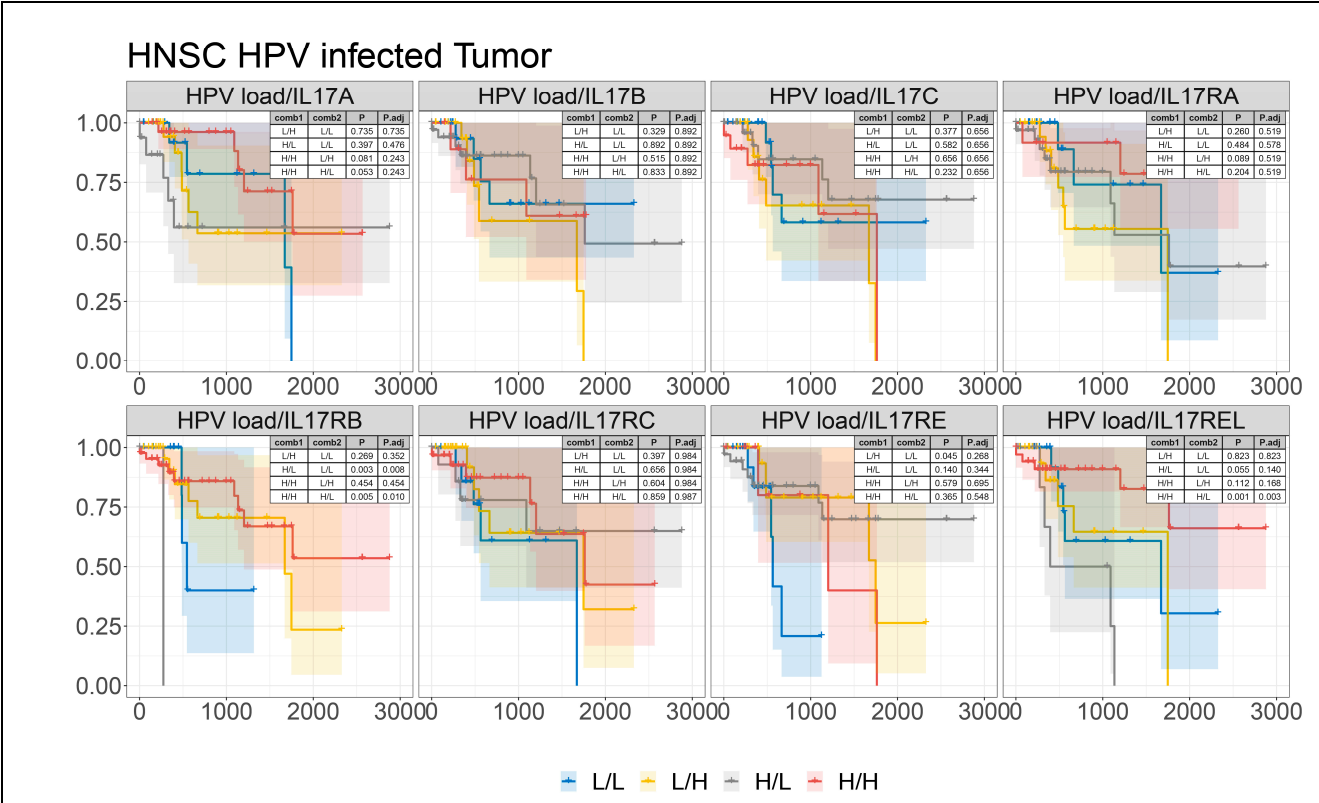

**Supplementary Figure 11.** Survival analysis and correlation test of IL-17 family members. Combined HNSC patient survival analysis stratified for HPV viral loads and IL-17 family members. KM curves (y-axis, survival probability; x-axis, days) display HPV-infected HSNC patient survival plotted in all four combinations for each stratum (L/L, L/H, H/L, and H/H, both L and H groups were split by the median viral load or gene expression). For patients with higher HPV viral loads, only high expression of either *IL17RB* or *IL17REL* resulted in enhanced prognosis.
